# Supplementary material for: Obstetric triage improvement process using the Donabedian model of quality care: a quality improvement initiative
Source: HighWire-hosted journal article supplement (doi:10.1136/bmjoq-2021-001483), 2022-05-01
Supplement: bmjoq-2021-001483supp004_data_supplement.pdf [file bmjoq-2021-001483supp004_data_supplement.pdf]

|                               |
|-------------------------------|
| <b>Patient Identification</b> |
|-------------------------------|

**Women's Health Care**

**Physician order set for initial patient management at obstetric triage area**

Check (✓) all that apply

**Order at Triage Area:**

- Vital Signs  Fetal Heart Sound
- CTG monitoring if pregnancy is >28 weeks
- Patient assessed and reviewed by Physician.
- Patient clinical condition and management plan discussed with the consultant
- Decision of Admission
- Decision of Discharge
- Maintained Intravenous Cannula  CBC  PT  APTT  Grouping and Cross match
- Urine dipstick  Urine D/R  HVS Other \_\_\_\_\_

Physician Name and Mnemonic: \_\_\_\_\_ Date and Time: \_\_\_\_\_

Nurse Name and Initial \_\_\_\_\_ Date and Time: \_\_\_\_\_

**Admitting orders:**

Attending Physician \_\_\_\_\_

**Care Level:**  Labour Room  Ward  LR OR  Main OR  SCU

**CTG Monitoring:**  Stat  Every 4 hourly  CTG per shift

**Activity:**  Complete bed rest (CBR)  CBR with bathroom privileges  Activity as tolerated

**Diet:**  Regular  Soft  Full liquid  Diabetic diet  Clear Liquid  Nothing per oral (NPO)

**Labs:**  CBC  PT  APTT  Urine D/R  Grouping and Cross match  HVS Other \_\_\_\_\_

**Management Plan:**  Observation  Augmentation of labour  Prepare for emergency cesarean section

Start Intravenous fluid \_\_\_\_\_ at the rate of \_\_\_\_\_

\_\_\_\_\_  
Physician Name, Mnemonic and signature \_\_\_\_\_  
Date and Time

\_\_\_\_\_  
Nurse Name and Signature \_\_\_\_\_  
Date and Time
